# Supplementary material
Source: Research Square preprint supplement (doi:10.21203/rs.3.rs-9930445/v1)
Supplement: Supplementary file 1 [file 3cc0a3ba780f55f66ad412e4.pdf]

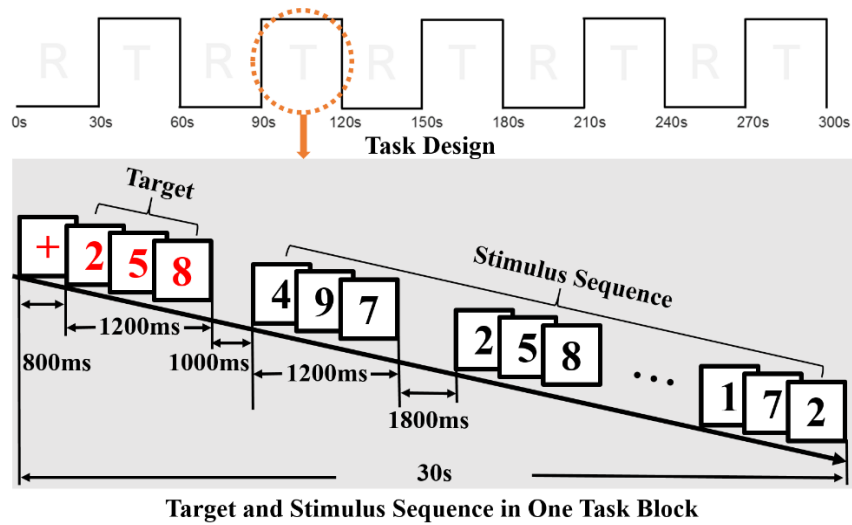

**Figure S1:** Design of the visual sustained attention task for fMRI.

**Table S1** Detailed information of the TBI group.

| Variable                                     | N. or Mean (SD)                                                                                                                                                                         |
|----------------------------------------------|-----------------------------------------------------------------------------------------------------------------------------------------------------------------------------------------|
| <b>Number of TBI</b>                         | Once: 27<br>More than once: 19                                                                                                                                                          |
| <b>Years since the 1<sup>st</sup> injury</b> | 5.74 (3.68)                                                                                                                                                                             |
| <b>Cause of TBI</b>                          | Sport-related: 35<br>Recreational activity: 12                                                                                                                                          |
| <b>Type of sports</b>                        | Soccer: 9<br>Lacrosse: 2<br>Ice Hockey: 3<br>Track & Field: 3<br>Basketball: 6<br>Baseball: 1<br>Volleyball: 4<br>Cricket: 1<br>Judo: 2<br>Tennis: 1<br>More than one type of sport: 15 |
| <b>Glasgow Coma Scale Scores</b>             | 13-15: 27<br>9-12: 17                                                                                                                                                                   |

TBI: traumatic brain injury; N: number of subjects; SD: standard deviation.
