# Supplementary material
Source: Research Square preprint supplement (doi:10.21203/rs.3.rs-9930445/v1)
Supplement: Supplementary file 2 [file 962b4b9eb9797f2c4e73f496.pdf]

**Table 1:** Demographic, clinical/behavioral, and fMRI task performance measures of the study sample.

|                                     | <b>NC<br/>(N=45)</b> | <b>TBI<br/>(N=44)</b> |                       |
|-------------------------------------|----------------------|-----------------------|-----------------------|
|                                     | <b>Mean (SD)</b>     | <b>Mean (SD)</b>      | <b><i>p</i> Value</b> |
| Age                                 | 22.36 (2.04)         | 21.63 (2.00)          | .167                  |
| Education year                      | 14.98 (1.95)         | 14.26 (1.56)          | .066                  |
| Mother's education year             | 15.35 (2.20)         | 15.55 (2.70)          | .710                  |
| Father's education years            | 15.77 (2.81)         | 15.50 (2.78)          | .660                  |
| CAARS scores                        |                      |                       |                       |
| Inattentive raw scores              | 4.67 (2.81)          | 9.31 (6.28)           | < .001                |
| Inattentive T-scores                | 45.88 (6.48)         | 57.02 (15.18)         | < .001                |
| Hyperactive/impulsive raw scores    | 5.07 (2.76)          | 9.19 (5.80)           | < .001                |
| Hyperactive/impulsive T-scores      | 42.58 (5.93)         | 52.52 (14.66)         | < .001                |
|                                     | <b>N (%)</b>         | <b>N (%)</b>          | <b><i>p</i> Value</b> |
| Male                                | 23 (53.49)           | 21 (50.00)            | .917                  |
| Right-handed                        | 43 (100)             | 42 (100)              | 1.000                 |
| Race/Ethnicity                      |                      |                       | .094                  |
| Caucasian                           | 12 (27.91)           | 21 (50.00)            |                       |
| Black or African American           | 4 (9.30)             | 7 (2.38)              |                       |
| Asian                               | 20 (46.51)           | 9 (21.43)             |                       |
| Hispanic/Latino                     | 2 (4.65)             | 2 (4.76)              |                       |
| More than one race                  | 5 (11.63)            | 3 (7.14)              |                       |
| fMRI Task performance measures      | <b>Mean (SD)</b>     | <b>Mean (SD)</b>      |                       |
| Accuracy rate                       | 0.99 (0.04)          | 0.99 (0.01)           | 0.344                 |
| Omission error rate                 | 0.009 (0.03)         | 0.001 (0.005)         | 0.131                 |
| Commission error rate               | 0.003 (0.01)         | 0.005 (0.01)          | 0.464                 |
| Overall response reaction time (ms) | 607.09 (134.73)      | 604.45 (132.83)       | 0.928                 |
| Correct response reaction time(ms)  | 606.72 (135.02)      | 603.83 (132.47)       | 0.921                 |

NC: normal control; TBI: traumatic brain injury; N: number of subjects; SD: standard deviation; *p*: level of significance; CAARS: Conner's adult ADHD self-reporting rating scales; ms: milliseconds.

**Table 2:** The top six most important features for successful classification (permutation importance Mean is 0.00093, standard deviation (SD) is 0.00085, BC: betweenness centrality, FN: task-based functional network, SN: white matter structural network).

| <b>Rank</b> | <b>Feature Label</b> | <b>Feature Meaning</b>                                                   | <b>Permutation Importance</b> | <b>Threshold</b> |
|-------------|----------------------|--------------------------------------------------------------------------|-------------------------------|------------------|
| 1           | ts_nodal_BC_node6    | Nodal BC of right caudate nucleus in FN                                  | 0.00345                       | >Mean + 1.5 SD   |
| 2           | Node51_BC            | Nodal BC of right cuneus in SN                                           | 0.00318                       | >Mean + 1.5 SD   |
| 3           | ts_nodal_deg_node10  | Nodal degree of right cingulate gyrus in FN                              | 0.00272                       | >Mean + 1.5 SD   |
| 4           | ts_nodal_deg_node84  | Nodal degree of left posterior superior temporal sulcus in FN            | 0.00262                       | >Mean + 1.5 SD   |
| 5           | Node72_Glo_Eff       | Nodal global efficiency of right rostral anterior cingulate region in SN | 0.00162                       | >Mean + 0.5 SD   |
| 6           | Node49_Glo_Eff       | Nodal global efficiency of right caudal anterior cingulate region in SN  | 0.00149                       | >Mean + 0.5 SD   |
